# Supplementary material
Source: PubMed Central journal article supplement (PMC3648005)
Supplement: IAI.01117-12_zii999090107so1.pdf [file IAI.01117-12_zii999090107so1.pdf]

**Supplement Table 1.** Primer sequences of *pvmosp1p* and *pvmosp1* genes for recombinant protein expression and COS-7 cell surface expression

| Name ( <i>pvmosp</i> -) | Sequences (5'-->3') <sup>a</sup>                | Position  | Fragment | Target gene     | Use         |
|-------------------------|-------------------------------------------------|-----------|----------|-----------------|-------------|
| 1p83A_F                 | gggCGGATATctcgagAACTGGAAGAACCTGCACAA            | 87-106    | 83A      | <i>pvmosp1p</i> | Recombinant |
| 1p 83A_R                | gcggtaccCGGgGATccctaGTCGCTGCTGATGTTTTTCG        | 816-834   |          |                 | protein     |
| 1p 83B_F                | gggCGGATATctcgagGTCTATTCGGGTGTCTACGCC           | 684-664   | 83B      | <i>pvmosp1p</i> | expression  |
| 1p 83B_R                | gcggtaccCGGgGATccctaCGTGGGAATTTTTCCCTCTC        | 1565-1584 |          |                 |             |
| 1p 83C_F                | gggCGGATATctcgagAGGGCCTACATAGCCGAGA             | 1434-1452 | 83C      | <i>pvmosp1p</i> |             |
| 1p 83C_R                | gcggtaccCGGgGATccctaTACAAGCCGGAGTTAAGG          | 2176-2193 |          |                 |             |
| 1p 30_F                 | gggCGGATATctcgagGCCTATATGAGTGAGCACCTTG          | 2194-2215 | 30       | <i>pvmosp1p</i> |             |
| 1p 30_R                 | gcggtaccCGGgGATccctaGCGATACACGGTTTTTCCTCTC      | 3118-3138 |          |                 |             |
| 1p 38_F                 | gggCGGATATctcgagCAGCTGCAAGCGGGGTT               | 3139-3155 | 38       | <i>pvmosp1p</i> |             |
| 1p 38_R                 | gcggtaccCGGgGATccctaGACGAGTGAGTAGAATTCTTTCATTTT | 4396-4422 |          |                 |             |
| 1p 42_F                 | gggCGGATATctcgagGACACCCTACACACAATCAAACTGT       | 4423-4448 | 42       | <i>pvmosp1p</i> |             |
| 1p 42_R                 | gcggtaccCGGgGATccctaGCTGCACACGACCCCCTC          | 5485-5502 |          |                 |             |
| 1p 33_F                 | gggCGGATATctcgagGACACCCTACACACAATCAAACTGT       | 4423-4448 | 33       | <i>pvmosp1p</i> |             |
| 1p 33_R                 | gcggtaccCGGgGATccctaCGCTGCGGCCTTCAG             | 5230-5244 |          |                 |             |
| 1p 19_F                 | gggCGGATATctcgagGACCGTGTGGAAAAGAACTGC           | 5244-5264 | 19       | <i>pvmosp1p</i> |             |
| 1p 19_R                 | gcggtaccCGGgGATccctaACTCCCTCTGCCTTATATGACG      | 5481-5502 |          |                 |             |
| 1p 30_Cos7F             | ggtcctggacGAATTCGCCTATATGAGTGAGCACCTTG          | 2194-2215 | 30       | <i>pvmosp1p</i> | COS-7 cell  |
| 1p 30_Cos7R             | gtgtatggggccttGGGCCCTCTCCTTTTGGCACATAGCG        | 3118-3138 |          |                 | surface     |
| 1p 42-Cos7F             | ggtcctggacGAATTCGACACCCTACACACAATCAAACTGT       | 4423-4448 | 42       | <i>pvmosp1p</i> | expression  |

|             |                                                        |           |    |                |
|-------------|--------------------------------------------------------|-----------|----|----------------|
| 1p 42_Cos7R | gtgtatggggcctt <u>GGGCCC</u> GCTGCACACGACCCCCTC        | 5485-5502 |    |                |
| 1p 33_Cos7F | ggcctggac <u>GAATTC</u> GACACCCTACACACAATCAACTGT       | 4423-4448 | 33 | <i>pvmsp1p</i> |
| 1p 33_Cos7R | gtgtatggggcctt <u>GGGCCC</u> GCTGCGGCCTTCAG            | 5230-5244 |    |                |
| 1p 19_Cos7F | ggcctggac <u>GAATTC</u> GACCGTGTGGAAAAGAACTGC          | 5244-5264 | 19 | <i>pvmsp1p</i> |
| 1p 19_Cos7F | gtgtatggggcctt <u>GGGCCC</u> GCTGCACACGACCCCCTC        | 5481-5502 |    |                |
| 1 19_Cos7F  | ggcctggac <u>GAATTC</u> ACTATGAGCTCCGAGCACACAT         | 4918-4939 | 19 | <i>pvmsp1</i>  |
| 1-19_Cos7R  | gtgtatggggcctt <u>GGGCCC</u> GCTACAGAAAACCTCCCTCAAAGAG | 5152-5187 |    |                |

---

<sup>a</sup>The vector sequences are italicized, and the *Eco*RI and *Apa*I sites are underlined.
